# Supplementary material for: Flower-like Bi 12 O 17 Cl 2 /β-Bi 2 O 3 heterojunction for photocatalytic wastewater purification
Source: Royal Society of Chemistry journal article supplement (doi:10.1039/d5re00488h), 2026-01-01
Supplement: d5re00488h1.pdf [file d5re00488h1.pdf]

***Supplementary material for***

**Flower-like  $\text{Bi}_{12}\text{O}_{17}\text{Cl}_2/\beta\text{-Bi}_2\text{O}_3$  heterojunction for photocatalytic  
wastewater purification**

Tianyuan Xiao<sup>a,1</sup>, Xinyue Dong<sup>c,1</sup>, Yong Li<sup>a</sup>, Xiaoya Ding<sup>b\*</sup>, Guangming Yin<sup>a,c\*</sup>

- a. College of Light Industry and Textiles, Qiqihar University, Qiqihar, China, 161006.
- b. College of Architecture and Civil Engineering, Qiqihar University, Qiqihar, China, 161006.
- c. Center for Analytical Testing, Qiqihar University, Qiqihar, China, 161006.

\*Corresponding author: qdyingm@163.com, dxy03422@163.com

**Table. S1**

Table S1. The grain size of the characteristic diffraction peaks

| Materials                                                       | Hkl | FWHM  | Grain size |
|-----------------------------------------------------------------|-----|-------|------------|
| $\text{Bi}_{12}\text{O}_{17}\text{Cl}_2$                        | 117 | 0.332 | 24.5 nm    |
| $\beta\text{-Bi}_2\text{O}_3$                                   | 222 | 0.243 | 35.2 nm    |
| $\text{Bi}_{12}\text{O}_{17}\text{Cl}_2(\text{heterojunction})$ | 117 | 0.392 | 20.8 nm    |
| $\beta\text{-Bi}_2\text{O}_3(\text{heterojunction})$            | 222 | 0.185 | 42.7 nm    |

## S1 Raman spectrum

In order to further confirm the crystal structure, the Raman spectra are necessary as these two phases have totally different Raman peaks. As for  $\text{Bi}_{12}\text{O}_{17}\text{Cl}_2/\beta\text{-Bi}_2\text{O}_3$  material's characteristic peaks of the  $\beta\text{-Bi}_2\text{O}_3$  and  $\text{Bi}_{12}\text{O}_{17}\text{Cl}_2$  were present in the heterostructures. Fig. S1 reveals from the Raman spectra of the  $\beta\text{-Bi}_2\text{O}_3$  that all the peaks located at 119, 311, 463 and 600  $\text{cm}^{-1}$  in the pattern of the sample grown were well assigned to the  $\beta\text{-Bi}_2\text{O}_3$ . In fact, this material displays the Raman band pattern of a typical  $\text{Bi}_{12}\text{O}_{17}\text{Cl}_2$  compound with its main bands at 143, and a weak band at 377  $\text{cm}^{-1}$ . These bands correspond to the  $A_{1g}$  internal Bi-Cl stretching mode,  $E_{1g}$  internal Bi-Cl stretching vibration. The Raman analysis further, confirmed the synthesis of  $\text{Bi}_{12}\text{O}_{17}\text{Cl}_2/\beta\text{-Bi}_2\text{O}_3$  heterostructures.

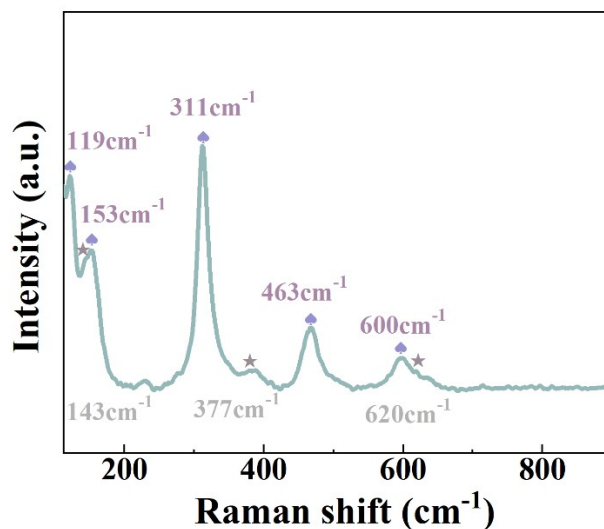

Fig. S1. Raman shift of particles.

## S2 TRPL measurements

The average carrier lifetime of the Flower-like  $\text{Bi}_{12}\text{O}_{17}\text{Cl}_2/\beta\text{-Bi}_2\text{O}_3$  heterojunction catalyst was  $\tau=7.28$  ns, which was obviously longer than that of the single-component  $\text{Bi}_{12}\text{O}_{17}\text{Cl}_2$  (4.06 ns) and  $\beta\text{-Bi}_2\text{O}_3$  (3.68 ns). The longer carrier lifetime indicates that the construction of the heterojunction effectively inhibits the recombination of photogenerated electron-hole pairs, which further proves that the heterojunction structure can optimize the photocatalytic performance of the material.

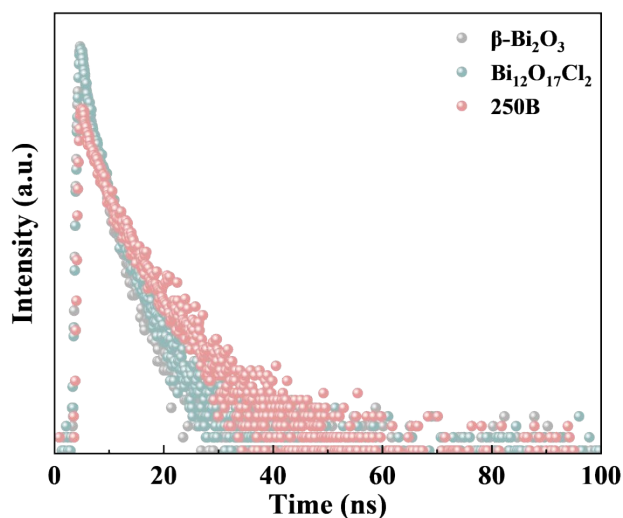

**Fig. S2.** TRPL signals.

**Table. S2**

Table S2. Photocatalysis degradation comparison with previous works

| Photocatalyst                                                        | pH  | Catalyst loading | MB concentration | Degradation | Time (min) | Ref. |
|----------------------------------------------------------------------|-----|------------------|------------------|-------------|------------|------|
| GO/TiO <sub>2</sub> /SiO <sub>2</sub>                                | 10  | 0.3 g/L          | 0.5 mg/L         | 84.6%       | 120        | 1    |
| Chlorophyll-TiO <sub>2</sub>                                         | 6   | 2.5 g/L          | 20 mg/L          | 85%         | 120        | 2    |
| Cu <sub>2-x</sub> Se NPs                                             | 7   | 0.5 g/L          | 10 mg/L          | 90.3%       | 90         | 3    |
| MnTiO <sub>3</sub>                                                   | 7   | 0.05 g/L         | 15 mg/L          | 75%         | 240        | 4    |
| GO                                                                   | 6.8 | 0.2 g/L          | 25 mg/L          | 99%         | 60         | 5    |
| g-C <sub>3</sub> N <sub>4</sub> /Fe <sub>3</sub> O <sub>4</sub>      | 3   | 0.4 g/L          | 20 mg/L          | 90%         | 90         | 6    |
| Au-BiFeO <sub>3</sub>                                                | 7   | 0.15 g/L         | 10 mg/L          | 92%         | 120        | 7    |
| N-TiO <sub>2</sub> /CNT                                              | 7   | 0.25 g/L         | 20 mg/L          | 94%         | 90         | 8    |
| Co <sub>3</sub> O <sub>4</sub> /ZnO@MG-C <sub>3</sub> N <sub>x</sub> | 7   | 0.25 g/L         | 12 mg/L          | 89.5%       | 120        | 9    |
| Commercial ZnO                                                       | 6.8 | 0.4 g/L          | 12 mg/L          | 85.7%       | 60         | 10   |
| Our work                                                             | 6   | 0.04 g/L         | 10 mg/L          | 91.5%       | 120        |      |

### S3 ESR analysis

Recognizing the significance of active radicals in photocatalytic wastewater purification, ESR spin-trap experiments using DMPO were conducted. Fig. S3 present the results, demonstrating that 250B did not show significant ESR signals of  $\cdot\text{O}_2^-$  in the absence of light. However, under visible light exposure for 30 minutes, the photoexcitation of the 250B composite resulted in pronounced peaks of DMPO- $\cdot\text{O}_2^-$  and TEMPO- $\text{h}^+$ , indicating the generation of  $\text{h}^+$  and  $\cdot\text{O}_2^-$  radicals. Comparing the signal peaks across the samples, it was observed that the signal intensities of the TEMPO- $\text{h}^+$  spin adduct were slightly stronger than those of  $\cdot\text{O}_2^-$ . The presence of active radicals in the  $\text{Bi}_{12}\text{O}_{17}\text{Cl}_2/\beta\text{-Bi}_2\text{O}_3$  system was attributed to multiple electron transfer pathways at heterojunction interfaces and the exposure of active crystal planes.

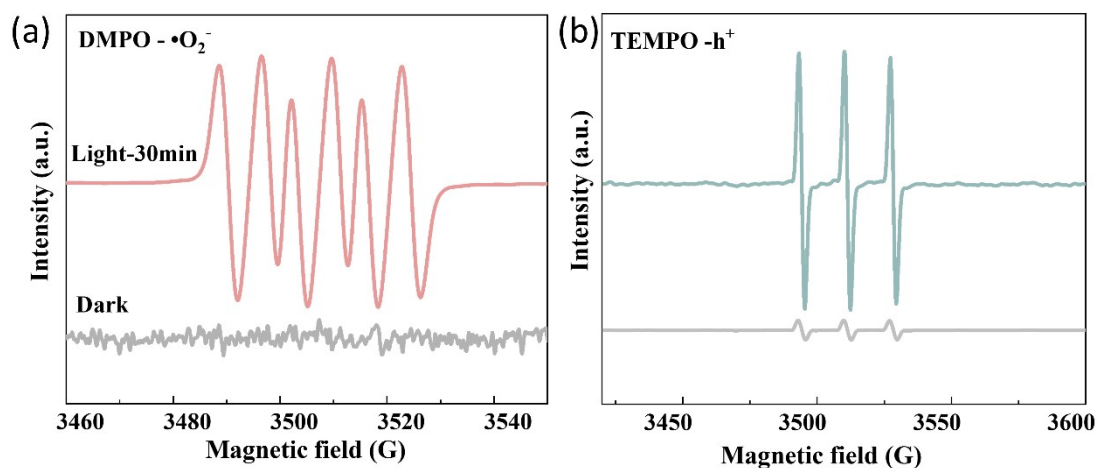

**Fig. S3.** (a) DMPO- $\cdot\text{O}_2^-$  and (b) TEMPO- $\text{h}^+$ .

## References

1. Zhou, Y., et al. A Comparative Study of GO/TiO<sub>2</sub>/SiO<sub>2</sub> Catalysts for the Photocatalytic Degradation of Methylene Blue and Phenolic Compounds. *Catalysts*, (2025), 15(2), 289.
2. Krishnan, Sukanya, and Amritanshu Shriwastav. Application of TiO<sub>2</sub> nanoparticles sensitized with natural chlorophyll pigments as catalyst for visible light photocatalytic degradation of methylene blue. *Journal of Environmental Chemical Engineering* 9.1 (2021): 104699.
3. Patel, Pushpanjali, et al. Sunlight-driven catalytic degradation of MB dye and multi-cycle Re-usability analysis of Cu<sub>2-x</sub>Se nanoparticles. *Heliyon* 10.21 (2024).
4. Alkaykh, Suhila, Aïcha Mbarek, and Elbashir E. Ali-Shattle. Photocatalytic degradation of methylene blue dye in aqueous solution by MnTiO<sub>3</sub> nanoparticles under sunlight irradiation. *Heliyon* 6.4 (2020).
5. Thakur, Sahil, et al. Standalone Highly Efficient Graphene Oxide as an Emerging Visible Light-Driven Photocatalyst and Recyclable Adsorbent for the Sustainable Removal of Organic Pollutants. *Langmuir* 40.35 (2024): 18486-18502.
6. Avilés-Monreal, Raúl, et al. Degradation of methylene blue catalyzed by a photo-Fenton reaction of g-C<sub>3</sub>N<sub>4</sub>/Fe<sub>3</sub>O<sub>4</sub> nanocomposite with visible light. *Fullerenes, Nanotubes and Carbon Nanostructures* (2025): 1-14.
7. Wu, Jhen-Yang, et al. Tunable photocatalytic properties of Au-decorated BiFeO<sub>3</sub> nanostructures for dye photodegradation. *ACS Applied Nano Materials* 7.8 (2024): 9777-9788.
8. Rajput, Rekha B., et al. N-doped carbon/TiO<sub>2</sub> composites with enhanced photocatalytic performance for the removal of organic pollutants. *Journal of Physics and Chemistry of Solids* 184 (2024): 111677.
9. Li, Ying, et al. Synthesis of Co<sub>3</sub>O<sub>4</sub>/ZnO@ MG-C<sub>3</sub>N<sub>x</sub> Catalysts and Their Visible Light Degradation of Methylene Blue Performance. *Chinese Journal of Materials Research* 39.4 (2025): 241-250.
10. Liu, Huifang, et al. ZnO rod decorated with Ag nanoparticles for enhanced photocatalytic degradation of methylene blue. *Journal of Physics and Chemistry of*

Solids 129 (2019): 46-53.
